# Supplementary material for: Experimental and Computational Analysis of Para-Hydroxy Methylcinnamate following Photoexcitation
Source: MDPI journal article supplement (doi:10.3390/molecules26247621), 2021-12-15
Supplement: s1 [file s1]

**Electronic Supplementary Information for:**

**Experimental and Computational Analysis of *Para*-Hydroxy  
Methylcinnamate Following Photoexcitation**

Jack Dalton,<sup>1</sup> Gareth W. Richings,<sup>1</sup> Jack M. Woolley,<sup>1</sup> Temitope T. Abiola,<sup>1</sup> Scott Habershon<sup>1,\*</sup>  
and Vasilios G. Stavros<sup>1,\*</sup>

<sup>1</sup> Department of Chemistry, University of Warwick, Gibbet Hill Road, Coventry, CV4 7AL, UK.

\* Correspondence: S.Habershon@warwick.ac.uk and V.Stavros@warwick.ac.uk

## Section 1: Experimental

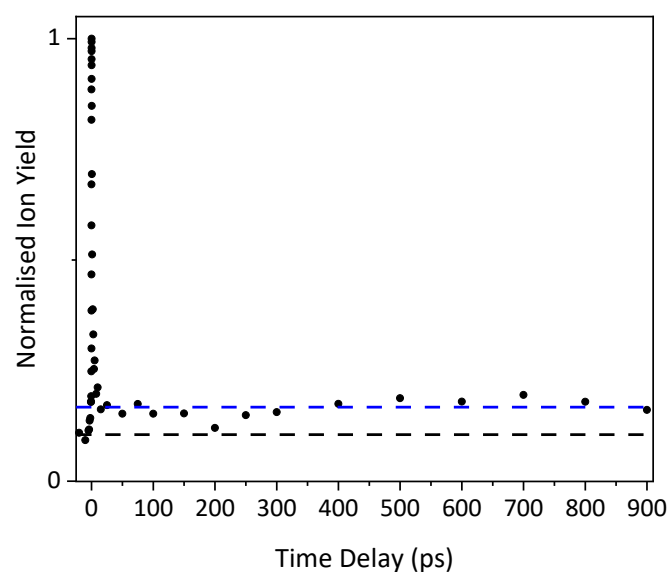

**Figure S1.** TR-IY transient of *p*-HMC at 308.5 nm pump and 240 nm probe to show the long-lived feature extending beyond 900 ps. The black dashed line shows the signal baseline, and the blue dashed line shows the baseline offset of the long-lived feature.

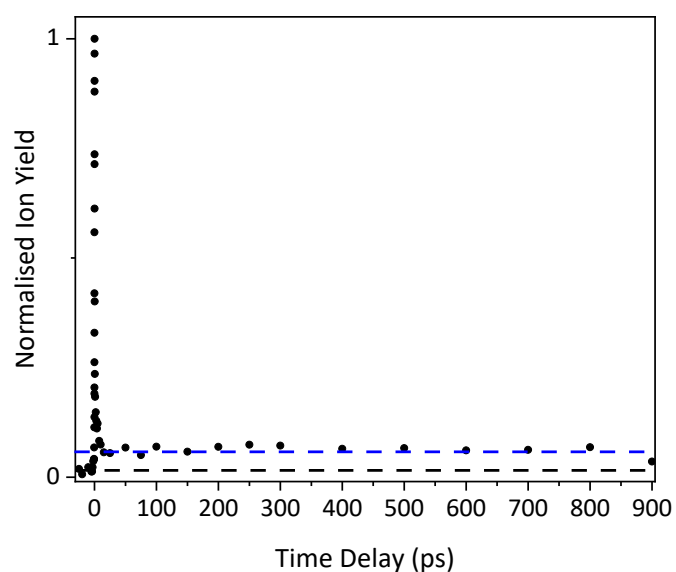

**Figure S2.** TR-IY transient of *p*-HMC at 308.5 nm pump and 200 nm probe to show the long-lived feature extending beyond 900 ps. The black dashed line shows the signal baseline, and the blue dashed line shows the baseline offset of the long-lived feature.

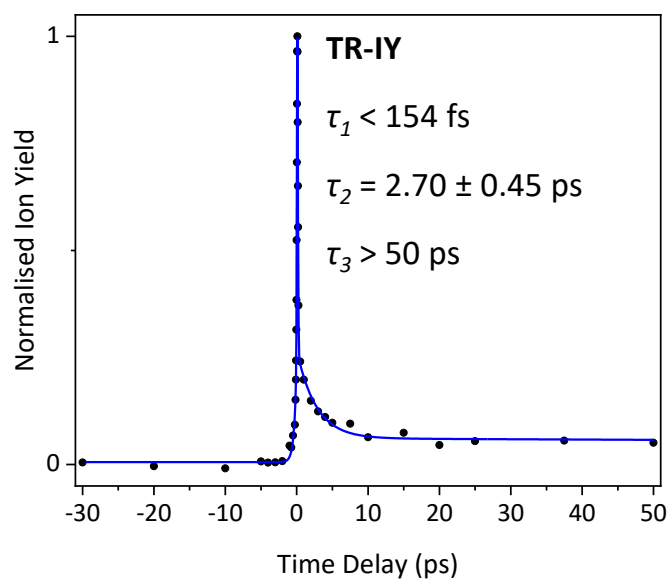

**Figure S3.** TR-IY transient of *p*-HMC at 308.5 nm pump and 200 nm probe with a 1.5 bar helium backing pressure. The polarisations of the pump and probe are at magic angle ( $54.7^\circ$ ) with respect to each other to avoid rotational artifacts resulting from laser induced transition dipole moment alignment. The lifetimes are within error of the lifetimes produced from parallel pump-probe polarisations (Figure 3 of manuscript).

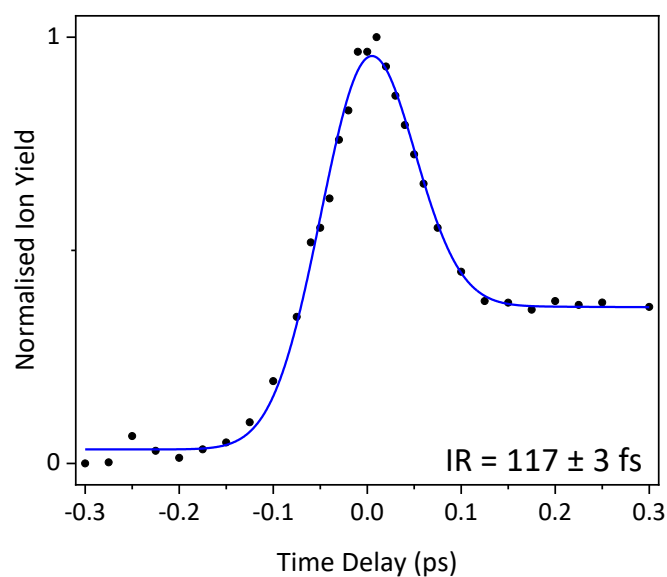

**Figure S4.** 308.5 nm pump and 240 nm probe TR-IY cross-correlation with ammonia to estimate the temporal resolution of the experiment. Here, 5% ammonia/helium gas mixture is expanded into vacuum via the Even-Lavie pulsed solenoid valve and subsequently excited and ionised with varying pump-probe time delays. The baseline offset is likely due to population of a long-lived Rydberg state with the pump[1]. The data is fitted with a Gaussian and a single (positive going) decay lifetime of 30 ps to account for the long-lived state population. This has been achieved using equation (2) from the manuscript plus a Gaussian function. The full width half maximum (FWHM) produced from the Gaussian corresponds to the IR (117 fs).

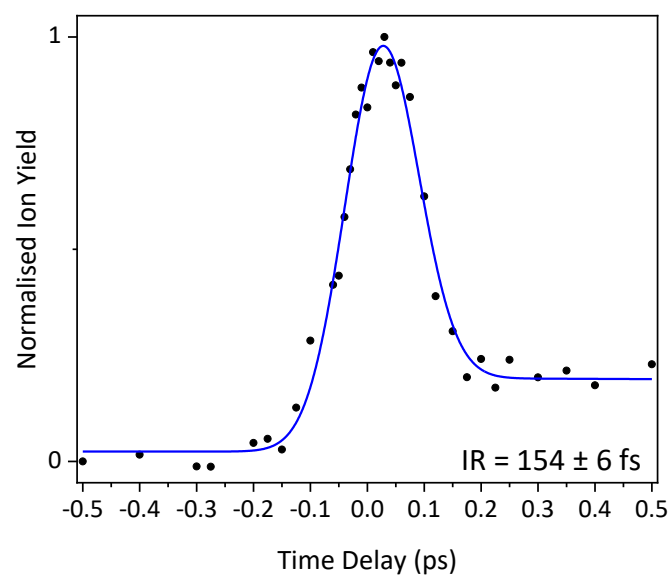

**Figure S5.** 308.5 nm pump and 200 nm probe TR-IY cross-correlation with ammonia to estimate the temporal resolution of the experiment. The method is analogous to the cross-correlation with 240 nm. The baseline offset is still seen with 200 nm, further indicating population of a long-lived Rydberg state with the pump. The extracted IR is 154 fs.

## Section 2: Computational

**Table S1.** Energies of the ground and excited states (first three singlet and first seven triplet) of *p*-HMC optimised from the *s-cis* OH-*anti* conformer using  $\omega$ B97X (TD)DFT/6-311G(d,p) as implemented in ORCA 5.0.1[2–6]. Energies are relative to the ground state at the Franck-Condon point ( $S_0$  minimum). NA indicates that the labelled minimum was sought but not located. The minima and conical intersections were located using restricted Kohn-Sham TDDFT whilst those state crossings labelled  $X_i/X_j$  (including those which are actually conical intersections) were found using unrestricted Kohn-Sham TDDFT.

| Optimised Geometry                  | Relative Energies (cm <sup>-1</sup> ) |       |       |       |       |       |       |       |       |       |       |
|-------------------------------------|---------------------------------------|-------|-------|-------|-------|-------|-------|-------|-------|-------|-------|
|                                     | $S_0$                                 | $S_1$ | $S_2$ | $S_3$ | $T_1$ | $T_2$ | $T_3$ | $T_4$ | $T_5$ | $T_6$ | $T_7$ |
| $S_0$ Minimum                       | 0                                     | 39993 | 41952 | 42588 | 24783 | 35026 | 35887 | 38613 | 39471 | 41484 | 46640 |
| $S_1$ Minimum                       | 2517                                  | 37512 | 42121 | 42529 | 21167 | 35892 | 36696 | 39295 | 40360 | 42933 | 46681 |
| $S_2$ Minimum                       | 1108                                  | 39058 | 40838 | 42899 | 23422 | 34043 | 35585 | 38088 | 39892 | 40428 | 47109 |
| $S_3$ Minimum                       | NA                                    |       |       |       |       |       |       |       |       |       |       |
| $T_1$ Minimum                       | 4294                                  | 38165 | 42968 | 43993 | 20545 | 37204 | 38527 | 40289 | 41853 | 44084 | 48101 |
| $T_2$ Minimum                       | 2942                                  | 41436 | 43539 | 45174 | 26850 | 32253 | 38257 | 39717 | 42077 | 43551 | 49381 |
| $T_3$ Minimum                       | 1199                                  | 39048 | 41461 | 42290 | 23541 | 34669 | 35282 | 37462 | 39307 | 40880 | 46478 |
| $T_4$ Minimum                       | NA                                    |       |       |       |       |       |       |       |       |       |       |
| $T_5$ Minimum                       | NA                                    |       |       |       |       |       |       |       |       |       |       |
| $T_6$ Minimum                       | NA                                    |       |       |       |       |       |       |       |       |       |       |
| $T_7$ Minimum                       | 2860                                  | 39870 | 40619 | 43747 | 24855 | 36939 | 36994 | 37932 | 40293 | 42144 | 42365 |
| $S_1/S_2$ Conical Intersection      | 2041                                  | 41300 | 41307 | 44590 | 26290 | 34062 | 35668 | 38705 | 41404 | 42135 | 48649 |
| $S_2/S_3$ Conical Intersection      | 14841                                 | 47335 | 48557 | 48577 | 26178 | 44824 | 45899 | 48409 | 50343 | 53285 | 53968 |
| $T_1/T_2$ Conical Intersection      | NA                                    |       |       |       |       |       |       |       |       |       |       |
| $T_2/T_3$ Conical Intersection      | 1756                                  | 40561 | 42482 | 44155 | 26279 | 33985 | 33999 | 39364 | 41035 | 41617 | 48286 |
| $T_3/T_4$ Conical Intersection      | 1789                                  | 38990 | 39486 | 42472 | 23994 | 35670 | 35954 | 35967 | 39318 | 41817 | 43692 |
| $T_4/T_5$ Conical Intersection      | 3045                                  | 40512 | 41916 | 43691 | 24597 | 36455 | 36753 | 39513 | 39519 | 40742 | 47839 |
| $T_5/T_6$ Conical Intersection      | 20019                                 | 50704 | 61958 | 64427 | 36833 | 47238 | 56705 | 62207 | 62697 | 62699 | 70002 |
| $T_6/T_7$ Conical Intersection      | 2897                                  | 39885 | 40472 | 43900 | 24853 | 36879 | 37055 | 38099 | 40482 | 42303 | 42308 |
| $X_1/X_2$ Crossing ( $T_1/T_2$ )    | NA                                    |       |       |       |       |       |       |       |       |       |       |
| $X_2/X_3$ Crossing ( $T_2/T_3$ )    | 1836                                  | 40591 | 42546 | 44254 | 26337 | 33982 | 34001 | 39451 | 41145 | 41667 | 48392 |
| $X_3/X_4$ Crossing ( $S_1/T_3$ )    | 3280                                  | 37990 | 42435 | 43462 | 21875 | 35113 | 37993 | 39567 | 41424 | 43763 | 47010 |
| $X_4/X_5$ Crossing ( $T_4/T_5$ )    | 1205                                  | 39052 | 40637 | 41599 | 23476 | 35052 | 35307 | 37645 | 37648 | 40837 | 44918 |
| $X_5/X_6$ Crossing ( $S_1/S_2$ )    | 2851                                  | 38662 | 38664 | 43406 | 22416 | 35817 | 36286 | 37655 | 40628 | 42670 | 43669 |
| $X_6/X_7$ Crossing ( $S_1/T_6$ )    | 1794                                  | 39464 | 41473 | 42347 | 23271 | 35781 | 36046 | 38626 | 39424 | 39474 | 46517 |
| $X_7/X_8$ Crossing ( $S_2/T_6$ )    | 1166                                  | 39076 | 40873 | 43153 | 23531 | 33842 | 35736 | 38242 | 40131 | 40882 | 47380 |
| $X_8/X_9$ Crossing ( $S_2/S_3$ )    | 1025                                  | 38837 | 41044 | 41053 | 23170 | 34481 | 35419 | 38006 | 38060 | 40377 | 45340 |
| $X_9/X_{10}$ Crossing ( $S_3/T_7$ ) | 1968                                  | 39194 | 39734 | 42691 | 24106 | 36201 | 36202 | 36504 | 39260 | 41634 | 42684 |

**Table S2.** Energies of the ground and excited states (first three singlet and first seven triplet) of *p*-HMC optimised from the *s-cis* OH-*syn* conformer using  $\omega$ B97X (TD)DFT/6-311G(d,p) as implemented in ORCA 5.0.1[2–6]. Energies are relative to the ground state at the Franck-Condon point ( $S_0$  minimum) for the *s-cis* OH-*anti* conformer (Table S1). NA indicates that the labelled minimum was sought but not located. The minima and conical intersections were located using restricted Kohn-Sham TDDFT whilst those state crossings labelled  $X_i/X_j$  (including those which are actually conical intersections) were found using unrestricted Kohn-Sham TDDFT.

| Optimised Geometry                  | Relative Energies/cm <sup>-1</sup> |       |       |       |       |       |       |       |       |       |       |
|-------------------------------------|------------------------------------|-------|-------|-------|-------|-------|-------|-------|-------|-------|-------|
|                                     | $S_0$                              | $S_1$ | $S_2$ | $S_3$ | $T_1$ | $T_2$ | $T_3$ | $T_4$ | $T_5$ | $T_6$ | $T_7$ |
| $S_0$ Minimum                       | 38                                 | 39882 | 41984 | 42620 | 24725 | 35077 | 35831 | 38831 | 39514 | 41366 | 46668 |
| $S_1$ Minimum                       | 2594                               | 37378 | 42199 | 42635 | 21111 | 35709 | 36901 | 39384 | 40786 | 42815 | 46781 |
| $S_2$ Minimum                       | 1196                               | 39049 | 40867 | 42995 | 23522 | 34050 | 35547 | 38286 | 39975 | 40473 | 47187 |
| $S_3$ Minimum                       | NA                                 |       |       |       |       |       |       |       |       |       |       |
| $T_1$ Minimum                       | 4081                               | 37966 | 42891 | 43883 | 20487 | 36904 | 38427 | 40213 | 41956 | 43732 | 47990 |
| $T_2$ Minimum                       | 2708                               | 41038 | 42686 | 44176 | 25544 | 32573 | 37978 | 39840 | 41128 | 43061 | 48430 |
| $T_3$ Minimum                       | NA                                 |       |       |       |       |       |       |       |       |       |       |
| $T_4$ Minimum                       | 1013                               | 39756 | 41416 | 42174 | 24640 | 34378 | 34694 | 37853 | 39134 | 40808 | 46285 |
| $T_5$ Minimum                       | NA                                 |       |       |       |       |       |       |       |       |       |       |
| $T_6$ Minimum                       | NA                                 |       |       |       |       |       |       |       |       |       |       |
| $T_7$ Minimum                       | NA                                 |       |       |       |       |       |       |       |       |       |       |
| $S_1/S_2$ Conical Intersection      | 2943                               | 38618 | 38629 | 43522 | 22438 | 35775 | 36185 | 37860 | 41044 | 42520 | 43656 |
| $S_2/S_3$ Conical Intersection      | 1070                               | 38780 | 41052 | 41067 | 23163 | 34455 | 35397 | 38071 | 38238 | 40291 | 45340 |
| $T_1/T_2$ Conical Intersection      | 43764                              | 70530 | 74495 | 75738 | 54902 | 54958 | 65547 | 73365 | 75531 | 76888 | 81144 |
| $T_2/T_3$ Conical Intersection      | 1831                               | 40618 | 42565 | 44264 | 26372 | 34007 | 34013 | 39577 | 41160 | 41468 | 48381 |
| $T_3/T_4$ Conical Intersection      | 3967                               | 40609 | 43547 | 44348 | 25254 | 36111 | 38823 | 38827 | 41374 | 42158 | 48458 |
| $T_4/T_5$ Conical Intersection      | 979                                | 39090 | 40941 | 41442 | 23651 | 34611 | 35075 | 37939 | 37951 | 40521 | 45176 |
| $T_5/T_6$ Conical Intersection      | 1851                               | 39602 | 41563 | 42230 | 23626 | 35591 | 36064 | 38858 | 39283 | 39302 | 46378 |
| $T_6/T_7$ Conical Intersection      | 2891                               | 39859 | 40517 | 43879 | 24882 | 36837 | 37040 | 38052 | 40464 | 42269 | 42312 |
| $X_1/X_2$ Crossing ( $T_1/T_2$ )    | NA                                 |       |       |       |       |       |       |       |       |       |       |
| $X_2/X_3$ Crossing ( $T_2/T_3$ )    | 1912                               | 40660 | 42642 | 44360 | 26464 | 34004 | 34013 | 39664 | 41256 | 41532 | 48483 |
| $X_3/X_4$ Crossing ( $S_1/T_3$ )    | 2939                               | 37480 | 42522 | 42913 | 21404 | 35676 | 37490 | 39752 | 40852 | 43320 | 47187 |
| $X_4/X_5$ Crossing ( $S_1/T_4$ )    | 3390                               | 37931 | 40612 | 44185 | 24671 | 35181 | 36765 | 37930 | 40951 | 43094 | 43407 |
| $X_5/X_6$ Crossing ( $S_1/T_5$ )    | 2133                               | 39053 | 41264 | 42997 | 25765 | 35533 | 36248 | 36385 | 39050 | 41996 | 43745 |
| $X_6/X_7$ Crossing ( $S_2/T_5$ )    | 2982                               | 38407 | 40162 | 43605 | 23910 | 35764 | 36571 | 37804 | 40160 | 42308 | 43419 |
| $X_7/X_8$ Crossing ( $S_2/T_6$ )    | 1251                               | 39124 | 40878 | 43251 | 23634 | 33863 | 35697 | 38418 | 40235 | 40881 | 47468 |
| $X_8/X_9$ Crossing ( $T_6/T_7$ )    | 2998                               | 39864 | 40422 | 43929 | 24784 | 36924 | 36987 | 38193 | 40517 | 42283 | 42286 |
| $X_9/X_{10}$ Crossing ( $S_3/T_7$ ) | 2013                               | 39216 | 39640 | 42720 | 24076 | 35975 | 36227 | 36702 | 39497 | 41517 | 42714 |

**Table S3.** Energies of the ground and excited states (first three singlet and first seven triplet) of *p*-HMC optimised during transition state searches between geometries found between *s-cis* OH-*anti* conformers (Table S1) using  $\omega$ B97X (TD)DFT/6-311G(d,p) as implemented in ORCA 5.0.1[2–6]. Energies are relative to the ground state at the Franck-Condon point ( $S_0$  minimum) for the *s-cis* OH-*anti* conformer (Table S1).

| Optimised Geometry                                 | Relative Energies (cm <sup>-1</sup> ) |       |       |       |       |       |       |       |       |       |       |
|----------------------------------------------------|---------------------------------------|-------|-------|-------|-------|-------|-------|-------|-------|-------|-------|
|                                                    | $S_0$                                 | $S_1$ | $S_2$ | $S_3$ | $T_1$ | $T_2$ | $T_3$ | $T_4$ | $T_5$ | $T_6$ | $T_7$ |
| $S_0$ Min. $\rightarrow$ $S_1$ Min. TS ( $S_1$ )   | 2522                                  | 37502 | 42125 | 42526 | 21162 | 35886 | 36693 | 39301 | 40362 | 42925 | 46676 |
| $S_0$ Min. $\rightarrow$ $S_2$ Min. TS ( $S_2$ )   | 1115                                  | 39059 | 40838 | 42906 | 23428 | 34039 | 35575 | 38087 | 39902 | 40434 | 47100 |
| $S_0$ Min. $\rightarrow$ $S_1/S_2$ CI TS ( $S_1$ ) | 3759                                  | 38017 | 40651 | 44203 | 22856 | 36239 | 37398 | 38409 | 41613 | 43547 | 44748 |
| $S_0$ Min. $\rightarrow$ $S_1/S_2$ CI TS ( $S_2$ ) | 4815                                  | 43713 | 48224 | 46606 | 31525 | 35775 | 37483 | 38992 | 43399 | 44946 | 46283 |
| $S_0$ Min. $\rightarrow$ $X_5/X_6$ CI TS ( $S_1$ ) | 2522                                  | 37499 | 42126 | 42525 | 21160 | 35884 | 36693 | 39302 | 40360 | 42923 | 46674 |

**Table S4.** Energies of the ground and excited states (first three singlet and first seven triplet) of *p*-HMC optimised during transition state searches between geometries found between *s-cis* OH-*syn* conformers (Table S2) using  $\omega$ B97X (TD)DFT/6-311G(d,p) as implemented in ORCA 5.0.1[2–6]. Energies are relative to the ground state at the Franck-Condon point ( $S_0$  minimum) for the *s-cis* OH-*anti* conformer (Table S1).

| Optimised Geometry                                     | Relative Energies (cm <sup>-1</sup> ) |       |       |       |       |       |       |       |       |       |       |
|--------------------------------------------------------|---------------------------------------|-------|-------|-------|-------|-------|-------|-------|-------|-------|-------|
|                                                        | $S_0$                                 | $S_1$ | $S_2$ | $S_3$ | $T_1$ | $T_2$ | $T_3$ | $T_4$ | $T_5$ | $T_6$ | $T_7$ |
| $S_0$ Min. $\rightarrow$ $S_1/S_2$ CI TS ( $S_1$ )     | 2582                                  | 37378 | 42190 | 42620 | 21091 | 35710 | 36893 | 39371 | 40780 | 42800 | 46773 |
| $S_1/S_2$ CI $\rightarrow$ $S_1/T_5$ MECF TS ( $S_1$ ) | 10917                                 | 37846 | 46805 | 51823 | 30142 | 34748 | 42759 | 46638 | 48227 | 49572 | 49820 |
| $S_0$ Min. $\rightarrow$ $S_1$ Min. TS ( $S_1$ )       | 2918                                  | 37673 | 42913 | 43144 | 21450 | 36045 | 37240 | 40324 | 41111 | 43131 | 46580 |

**Table S5.** Energies of the ground and excited states (first three singlet and first seven triplet) of *p*-HMC optimised during transition state searches between geometries found between *s-cis* OH-*syn* (Table S2) and *s-cis* OH-*anti* (Table S1) conformers using  $\omega$ B97X (TD)DFT/6-311G(d,p) as implemented in ORCA 5.0.1[2–6]. Energies are relative to the ground state at the Franck-Condon point ( $S_0$  minimum) for the *s-cis* OH-*anti* conformer (Table S1).

| Optimised Geometry                                     | Relative Energies (cm <sup>-1</sup> ) |       |       |       |       |       |       |       |       |       |       |
|--------------------------------------------------------|---------------------------------------|-------|-------|-------|-------|-------|-------|-------|-------|-------|-------|
|                                                        | $S_0$                                 | $S_1$ | $S_2$ | $S_3$ | $T_1$ | $T_2$ | $T_3$ | $T_4$ | $T_5$ | $T_6$ | $T_7$ |
| $S_0$ Min. $\rightarrow$ $S_1/S_2$ CI TS ( $S_1$ )     | 2582                                  | 37378 | 42190 | 42620 | 21091 | 35710 | 36893 | 39371 | 40780 | 42800 | 46773 |
| $S_1/S_2$ CI $\rightarrow$ $S_1/T_5$ MECF TS ( $S_1$ ) | 10917                                 | 37846 | 46805 | 51823 | 30142 | 34748 | 42759 | 46638 | 48227 | 49572 | 49820 |
| $S_0$ Min. $\rightarrow$ $S_1$ Min. TS ( $S_1$ )       | 2918                                  | 37673 | 42913 | 43144 | 21450 | 36045 | 37240 | 40324 | 41111 | 43131 | 46580 |

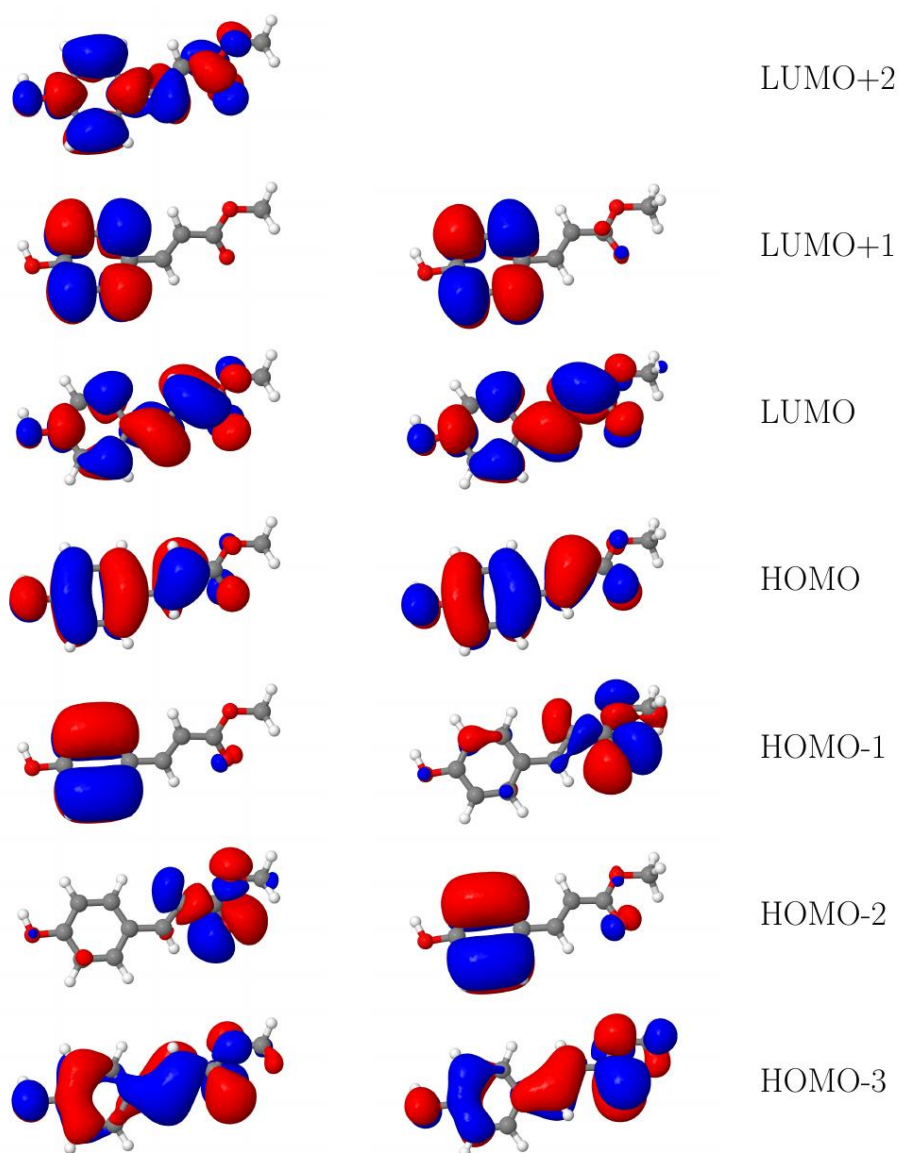

**Figure S6.** Molecular orbitals at the *syn*-conformer minimum energy crossing points (MECPs) labelled  $X_5/X_6$  ( $S_1/T_5$ ) and  $X_6/X_7$  ( $S_2/T_5$ ) in Figure 6 in the main text. On the left-hand side are those at the  $X_5/X_6$  crossing point: the  $S_1$  state is characterised by excitations from HOMO-2 to the virtual orbitals (hence its  $n\pi^*$  character) and the  $T_5$  state is characterised by excitations from HOMO-3, HOMO-1 and HOMO to the virtual orbitals (hence its  $\pi\pi^*$  character). The orbitals on the right are those at the  $X_6/X_7$  MECP: the  $S_2$  state is characterised by 68% excitation from the HOMO to the LUMO ( $\pi\pi^*$ ) with 20% from HOMO-1 to the LUMO ( $n\pi^*$ ), whilst the  $T_5$  state is characterised by excitations from HOMO-3 and HOMO-2 to the virtual orbitals ( $\pi\pi^*$ ).



## References

- (1) Dobber, M. R.; Buma, W. J.; de Lange, C. A. Two-Color Picosecond Time-Resolved ( $2 + 1'$ ) Resonance-Enhanced Multiphoton Ionization Photoelectron Spectroscopy on the  $B1E''$  and  $C' 1A1'$  States of Ammonia. *J. Phys. Chem.* **1995**, *99*, 1671–1685.
- (2) Neese, F. The ORCA Program System. *Wiley Interdiscip. Rev. Comput. Mol. Sci.* **2012**, *2*, 73–78.
- (3) Ekström, U.; Visscher, L.; Bast, R.; Thorvaldsen, A. J.; Ruud, K. Arbitrary-Order Density Functional Response Theory from Automatic Differentiation. *J. Chem. Theory Comput.* **2010**, *6*, 1971–1980.
- (4) Weigend, F. Accurate Coulomb-Fitting Basis Sets for H to Rn. *Phys. Chem. Chem. Phys.* **2006**, *8*, 1057–1065.
- (5) Krishnan, R.; Binkley, J. S.; Seeger, R.; Pople, J. A. Self-Consistent Molecular Orbital Methods. XX. A Basis Set for Correlated Wave Functions. *J. Chem. Phys.* **1980**, *72*, 650–654.
- (6) Frisch, M. J.; Pople J. A.; Binkley, J. S. Self-Consistent Molecular Orbital Methods 25. Supplementary Functions for Gaussian Basis Sets. *J. Chem. Phys.* **1984**, *80*, 3265–3269.
